# Supplementary material
Source: publisher site journal article supplement (https://www.dovepress.com/article/378263)
Supplement: Supplementary file 1 [file get_supplementary_file.php]

**Table S1. Clinical and endoscopic features of patients and their association with peri-ulcerative mucosal inflammation appearance**

| **Variable n (%)** | **Mild (n=449)** | **Moderate (n=520)** | **Severe (n=142)** | ***P*** | **SMD** |
| --- | --- | --- | --- | --- | --- |
| **Gender** |  |  |  | 0.755 | 0.046 |
| Male | 309 (68.82) | 357 (68.65) | 102 (71.83) |  |  |
| Female | 140 (31.18) | 163 (31.35) | 40 (28.17) |  |  |
| **Age** |  |  |  | 0.010 | 0.130 |
| ≤60 | 238 (53.01) | 225 (43.27) | 66 (46.48) |  |  |
| >60 | 211 (46.99) | 295 (56.73) | 76 (53.52) |  |  |
| **NSAIDs** |  |  |  | 0.001 | 0.216 |
| No | 394 (87.75) | 420 (80.77) | 107 (75.35) |  |  |
| Yes | 55 (12.25) | 100 (19.23) | 35 (24.65) |  |  |
| **Alcohol consumption** |  |  |  | 0.066 | 0.137 |
| No | 366 (81.51) | 441 (84.81) | 109 (76.76) |  |  |
| Yes | 83 (18.49) | 79 (15.19) | 33 (23.24) |  |  |
| **Bile Reflux** |  |  |  | <0.001 | 0.535 |
| No | 358 (79.73) | 352 (67.69) | 61 (42.96) |  |  |
| Yes | 91 (20.27) | 168 (32.31) | 81 (57.04) |  |  |
| ***Helicobacter pylori*** |  |  |  | <0.001 | 0.601 |
| No | 256 (57.02) | 259 (49.81) | 24 (16.90) |  |  |
| Yes | 193 (42.98) | 261 (50.19) | 118 (83.10) |  |  |
| **Gastritis Type** |  |  |  | <0.001 | 0.515 |
| Chronic Superficial Gastritis | 182 (40.53) | 122 (23.46) | 13 (9.15) |  |  |
| Chronic Atrophic Gastritis | 267 (59.47) | 398 (76.54) | 129 (90.85) |  |  |
| **GBS-Rebleeding-ROC** |  |  |  | <0.001 | 0.311 |
| <9.5 | 289 (64.37) | 289 (55.58) | 59 (41.55) |  |  |
| ≥9.5 | 160 (35.63) | 231 (44.42) | 83 (58.45) |  |  |

**Table S2. Multiple linear regression analysis of length of stay**

| **Variable** |  | **p** | **p2.5** | **p97.5** | **VIF** |
| --- | --- | --- | --- | --- | --- |
| (Intercept) |  | 0.000 | 8.034 | 8.708 |  |
| **Age** |  |  |  |  | 1.127 |
| ≤60 |  |  |  |  |  |
| >60 |  | <0.001 | 0.528 | 1.199 |  |
| **Peri-ulcerative mucosal inflammation appearance** |  |  |  |  | 1.105 |
| Mild |  |  |  |  |  |
| Moderate |  | 0.112 | -0.065 | 0.620 |  |
| Severe |  | <0.001 | 0.791 | 1.851 |  |
| **NSAIDs** |  |  |  |  | 1.138 |
| No |  |  |  |  |  |
| Yes |  | <0.001 | 0.819 | 1.713 |  |
| ***Helicobacter pylori*** |  |  |  |  | 1.075 |
| No |  |  |  |  |  |
| Yes |  | 0.048 | 0.003 | 0.658 |  |
| **GBS-Rebleeding-ROC** |  |  |  |  | 1.058 |
| <9.5 |  |  |  |  |  |
| ≥9.5 |  | 0.073 | −0.029 | 0.628 |  |
